# Supplementary material for: Organelles in Blastocystis that Blur the Distinction between Mitochondria and Hydrogenosomes
Source: PubMed Central journal article supplement (PMC2428068; doi:10.1016/j.cub.2008.03.037), 2008-04-22
Supplement: mmc2.pdf [file mmc2.pdf]

**SD Table 1: Sequences of N-terminal leader peptides for *Blastocystis* putative mitochondrial proteins**

| protein                                               | MitoProt                                                                            | probability |
|-------------------------------------------------------|-------------------------------------------------------------------------------------|-------------|
| Cystein desulfurase (IscS)                            | MLSRFSSVIARAPAVLSLSCRALPNGIHMM                                                      | 0.9688      |
| Mitochondrial metal transporter (Mmt1)                | MSFVVLRCSLARSPFQTAAIIRVASNRGLEACGKVR                                                | 0.9784      |
| Pyruvate dehydrogenase (PDH E1alpha)                  | MISRIAVKGIPIRQFVRAFSSRTFTVELPEF                                                     | 0.9866      |
| Dihydrolipoyl dehydrogenase (PDH E3)                  | MLSLSRASVIAQRSLYAARFFSAAAAADK                                                       | 0.9398      |
| Dihydrolipoyl transacetylase (PDH E2)                 | MLASKLARSVVNPKGAALLRHYSYDYTKHFLMPSAARLVALNHLDASNIVGTGLGGRIMRY                       | 0.6775      |
| Fumarase                                              | MFALAKSAPKFAAASKVAVRGVATRT                                                          | 0.9515      |
| Succinyl-CoA synthetase subunit beta (SCS beta)       | MLRMAPKTGVAVRNLIHEWQSKQLIQKYGGRA                                                    | 0.6301      |
| Alanine transaminase                                  | MLRLTKNVALPTLRCFSSRITID                                                             | 0.9736      |
| P-protein                                             | MQSLLRQTLRRSSNAGMAIRCFTAARPFAPCFKVV                                                 | 0.9963      |
| T-protein                                             | MLARFAQTLAKPTARAFSSGAIA                                                             | 0.9839      |
| L-protein                                             | MLSLSRASVIAQRSLYAARFFSAAAAADK                                                       | 0.9398      |
| Serine dehydrogenase                                  | MKRTSSHIRIISKGNH                                                                    | 0.8505      |
| Branched chain amino acid transaminase                | MMMSKSSVLARSFSAAKTNI                                                                | 0.5349      |
| Isovaleryl-CoA dehydratase                            | MLHSLCKQVGRCALSRVLPVHNPCFATLSKRAFSTDNECE                                            | 0.9559      |
| Carbamoyl phosphate synthetase (CPS)                  | MFGRSFGAGISSVRIARSFATEAELP                                                          | 0.9753      |
| Methylmalonyl-CoA mutase                              | MLAVSRQLTKSSVRFAVTPYPE                                                              | 0.9697      |
| mt Hsp70                                              | MRSSLATLARTHMT                                                                      | 0.6131      |
| Glyoxalase I                                          | MFANVAKRAFATGPKPYRILGVQIIAI                                                         | 0.9588      |
| Acetyl-CoA carboxylase                                | MLSKRAVAMTRSFAGAVDLT                                                                | 0.7623      |
| Mitochondrial elongation factor Tu (EF-Tu)            | MRLVAGKQMVPAFTSVRNATYERK                                                            | 0.2431      |
| Mitochondrial Ribosomal protein (MRP-L4)              | MLSRCFGACKTVACSWIKTPRV                                                              | 0.9786      |
| Mitochondrial ribosomal protein (MRP-L22)             | MSLLCRLGASVSIGRGISTASRVFSQNSLLGLPALMEMTNSPACMCCTQFIRSFHSHTKKY                       | 0.7917      |
| Mitochondrial ribosomal protein (MRP-L54/L37)         | MQSLLKLASIPRAALRSGAILAPQWHAASVYASTLSPFTRSFASDKKKG                                   | 0.9866      |
| Mitochondrial ADP/ATP carrier (AAC)                   | MGKKQDRRLTFMQNFIAAGGIAGVGSRTFTSPLDVVKIIAQVGSKQHSFGIFTKNIYKQEGRLGFWKGNVACLRLFPYSAINF | 0.7188      |
| ETF:ubiquinone oxidoreductase                         | MFRSLQRAVKQSFPSLLFLRGRGYPSSLFFTRVLSTESTET                                           | 0.9945      |
| Thioredoxin peroxidase                                | MLPKIAKTVASASKRFGVSAFTQVARFSQITYGPSQAFVRQ                                           | 0.9559      |
| Thioredoxin                                           | MVLPVSVASRAGSMVFRGFASAQDKV                                                          | 0.8934      |
| Pyruvate:ferredoxin oxidoreductase (PFO)              | MFNTLVKRAMTSAARYNSVCAATLPKAVIARN                                                    | 0.988       |
| [FeFe] hydrogenase                                    | MLSRLSRIATTKSMVMNAARSFAAEAQGK                                                       | 0.9304      |
| Complex I, subunit NDUF2                              | MLRCSKQSRMRPRAEFGTRI                                                                | 0.843       |
| Complex I, subunit NDUF5                              | MFATKALLATVKRT                                                                      | 0.4043      |
| Complex I, subunit NDUF7                              | MRRYTLTEGNMQRVISSAAKAA                                                              | 0.8712      |
| Complex I, subunit NDUF9                              | MLARFANKPSVRVLARSITSDVFPGLGLGGRMSQAPQKVITIFGASTGNLGRSVVYELASRGVTCMIPYRG             | 0.993       |
| Succinate dehydrogenase flavoprotein A (SDH-A)        | MLPSFRIMGKSAPALTRAFRATACRS                                                          | 0.9627      |
| Succinate dehydrogenase iron sulphur protein (SDH-ip) | MFARSLSSLSKVAVRGSVVLQISAMNFSTGFKIGPDGKIPSYKLFSLFRY                                  | 0.9801      |

SP: secretory pathway

mtSP: mitochondrial targeting peptide

NO: no targeting peptide predicted

**SD Table 1 continued**

| <b>protein</b>                                        | <b>TargetP</b>                                                   | <b>probability</b> | <b>SignalP</b>                   | <b>probability</b> | <b>iPSORT</b> |
|-------------------------------------------------------|------------------------------------------------------------------|--------------------|----------------------------------|--------------------|---------------|
| Cystein desulfurase (IscS)                            | MLSRF                                                            | 0.787              | MLSRFSSVIARAPAVLSLSCRA           | 0.915              | SP            |
| Mitochondrial metal transporter (Mmt1)                | MSFVVLRCSLARSPFQTAAIIRVASNRGLEACGKVRFM                           | 0.905              | MSFVVLRCSLARSPFQTAA              | 0.301              | mtSP          |
| Pyruvate dehydrogenase (PDH E1alpha)                  | MISRIVKGIPIRQFVRAFFSRTFTV                                        | 0.805              | MISRIVKGIPIRQFVRAFF              |                    | mtSP          |
| Dihydrolipoyl dehydrogenase (PDH E3)                  | MLSLSRASVIAQRSLYAARFF                                            | 0.879              | MLSLSRASVIAQRSLYAARFFSAAAA       | 0.462              | NO            |
| Dihydrolipoyl transacetylase (PDH E2)                 | MLASKLARSVVNPKGAALLRHV                                           | 0.875              | NO                               |                    | mtSP          |
| Fumarase                                              | MFALAKSAPKFAAASKVAVRG                                            | 0.612              | MFALAKSAPKFAAASKVAVRGVAT         | 0.15               | NO            |
| Succinyl-CoA synthetase subunit beta (SCS beta)       | MLRMAPKTVGAVRN                                                   | 0.524              | NO                               |                    | mtSP          |
| Alanine transaminase                                  | MLRLTKNVALPTLRFC                                                 | 0.743              | NO                               |                    | mtSP          |
| P-protein                                             | MQSLLRQTLRRSSNAGMAIRCF                                           | 0.952              | NO                               |                    | mtSP          |
| T-protein                                             | MLARFAQTLAKPTARAFSSGAAIA                                         | 0.677              | MLARFAQTLAKPTARAFSSGAAIAHTPL     | 0.107              | NO            |
| L-protein                                             | MLSLSRASVIAQRSLYAARFF                                            | 0.879              | MLSLSRASVIAQRSLYAARFFSAAAA       | 0.462              | NO            |
| Serine dehydrogenase                                  | NO                                                               |                    | NO                               |                    | mtSP          |
| Branched chain amino acid transaminase                | MMMSKSSVLARSFSAAKTNI                                             | 0.506              | NO                               |                    | mtSP          |
| Isovaleryl-CoA dehydratase                            | MLHSLCKQVGRCALSRYLPCVLHNPCFATLSKRAF                              | 0.756              | NO                               |                    | mtSP          |
| Carbamoyl phosphate synthetase (CPS)                  | MFGRSFAGISSVSRARSFA                                              | 0.796              | MFGRSFAGISSVSRARSFA              | 0.467              | mtSP          |
| Methylmalonyl-CoA mutase                              | MLAVSRQLTKSSVRAFAVTYPPE                                          | 0.663              | NO                               |                    | mtSP          |
| mt Hsp70                                              | MRSSLATLARTHMRMTM                                                | 0.498              | MRSSLATLARTHMRMTATA              | 0.297              | NO            |
| Glyoxalase I                                          | MFANVAKRAF                                                       | 0.694              | NO                               |                    | mtSP          |
| Acetyl-CoA carboxylase                                | MLSKRA                                                           | 0.707              | NO                               |                    | NO            |
| Mitochondrial elongation factor Tu (EF-Tu)            | MRLVAGKQMVPAFTSVRN                                               | 0.566              | NO                               |                    | NO            |
| Mitochondrial Ribosomal protein (MRP-L4)              | MLSRFC                                                           | 0.683              | NO                               |                    | mtSP          |
| Mitochondrial ribosomal protein (MRP-L22)             | MSLLCRLGSVASIGRGISTASRVFSQNSLLGLPALMEMTNSPACMCCTQFIRSF           | 0.917              | MSLLCRLGSVASIGR                  | 0.517              | mtSP          |
| Mitochondrial ribosomal protein (MRP-L54/L37)         | MQSLLKLASIPRAALRSGAILAPQWHAASVYASTLSPFTRSF                       | 0.804              | MQSLLKLASIPRAALRSGAILAPQWHAASVY  | 0.874              | mtSP          |
| Mitochondrial ADP/ATP carrier (AAC)                   | MGKKQDRRLTFMQNFIAGGIAGVGSRTF                                     | 0.587              | NO                               |                    | NO            |
| ETF:ubiquinone oxidoreductase                         | MFRSLQRA                                                         | 0.955              | probability for signal anchor    | 0.723              | mtSP          |
| Thioredoxin peroxidase                                | MLPKIAKTVASASKRFGGVSAFTQVARFSQITYGP                              | 0.881              | MLPKIAKTVASASKRFGGVSAFTQVARFSF   | 0.342              | mtSP          |
| Thioredoxin                                           | MVLPSVASRAGSMVFQRF                                               | 0.561              | MVLPSVASRAGSMVFGGFASA            | 0.116              | NO            |
| Pyruvate:ferredoxin oxidoreductase (PFO)              | MFNTLVKRAMTSAARYNSVCAATLPKAVIARN                                 | 0.863              | MFNTLVKRAMTSAARYNSVCAATLPKAVIARN | 0.111              | NO            |
| [FeFe] hydrogenase                                    | MLSRLSRIATTKSMLVMNAARSF                                          | 0.831              | MLSRLSRIATTKSMLVMNAARSFA         | 0.434              | mtSP          |
| Complex I, subunit NDUF2                              | MLRCS                                                            | 0.71               | NO                               |                    | mtSP          |
| Complex I, subunit NDUF5                              | MFATKALLATVKRTGMVGLPVIPNARA                                      | 0.356              | MFATKALLATVKRTGMVGLPVIPNARA      | 0.492              | NO            |
| Complex I, subunit NDUF7                              | MRRYTLTEGNMQRVIVISSAAKAASKNAIQTY                                 | 0.702              | NO                               |                    | mtSP          |
| Complex I, subunit NDUF9                              | MLARFANKPSVRVLRARSITSDVFPGLTGLGGRMSQAPQVKTIIFGASTGNLGRSVVYELASRG | 0.731              | NO                               |                    | mtSP          |
| Succinate dehydrogenase flavoprotein A (SDH-A)        | MLPSFRIMGKSAPALTRAFRATACRS                                       | 0.882              | MLPSFRIMGKSAPALTRAFRATACRS       | 0.546              | mtSP          |
| Succinate dehydrogenase iron sulphur protein (SDH-ip) | MFARS                                                            | 0.778              | MFARSLSSLSKVAVRGSVVLPQISA        | 0.449              | SP            |

SP: secretory pathway  
mtSP: mitochondrial targeting peptide  
NO: no targeting peptide predicted
