# Supplementary material for: Organelles in Blastocystis that Blur the Distinction between Mitochondria and Hydrogenosomes
Source: PubMed Central journal article supplement (PMC2428068; doi:10.1016/j.cub.2008.03.037), 2008-04-22
Supplement: mmc3.pdf [file mmc3.pdf]

Table 2. List of 113 potential *Blastocystis* mitochondrial proteins and proteins associated with mitochondria with their EST accession numbers

| Metabolic pathway/component                                   | Gene product                                                           | Gene function                                                                                                                               | Target Signal* | Accession no.                                                                                      |
|---------------------------------------------------------------|------------------------------------------------------------------------|---------------------------------------------------------------------------------------------------------------------------------------------|----------------|----------------------------------------------------------------------------------------------------|
| Complex I<br>(protein annotation as for <i>Homo sapiens</i> ) | NADH dehydrogenase subunit NDUFS8                                      | removal of two electrons from NADH and transfer to ubiquinone coupled with moving 4 protons across the membrane to create a proton gradient | ??             | EC648261                                                                                           |
|                                                               | NADH dehydrogenase subunit NDUFA2                                      |                                                                                                                                             | +              | EC648357, EC647734, EC640111                                                                       |
|                                                               | NADH dehydrogenase subunit NDUFA5                                      |                                                                                                                                             | +              | EC646670, EC642739, EC648955                                                                       |
|                                                               | NADH dehydrogenase subunit NDUFS7                                      |                                                                                                                                             | +              | EC651574, EC645176, EC641240                                                                       |
|                                                               | NADH dehydrogenase subunit NDUFA9                                      |                                                                                                                                             | +              | EC651599, EC649395, EC643171                                                                       |
|                                                               | NADH dehydrogenase subunit NDUFV1                                      |                                                                                                                                             | ??             | EC642144, EC649297, EC642104, EC641703, EC640678                                                   |
|                                                               | NADH dehydrogenase subunit ND4                                         |                                                                                                                                             | orgDNA?        | EF512301 <sup>†</sup>                                                                              |
| NADH dehydrogenase subunit ND2                                | orgDNA?                                                                | EF512302 <sup>†</sup>                                                                                                                       |                |                                                                                                    |
| NADH dehydrogenase subunit NDUFS3 (=ND9)                      | orgDNA?                                                                | EF512302 <sup>†</sup>                                                                                                                       |                |                                                                                                    |
| Complex II (TCA cycle) or fumarate reductase                  | Succinate dehydrogenase flavoprotein A (SDH1-1, SDH1-2)                | SDH oxidizes succinate into fumarate while passing electrons via FAD to ubiquinone, FRD: reduction of fumarate to succinate                 | +              | EC644724, EC645380, EC643838, EC650234, EC649122, EC649237, EC648601, EC648130, EC647212           |
|                                                               | SDH iron sulphur protein (SDH-ip)                                      |                                                                                                                                             | +              | EC648965, EC648221, EC644666, EC646657                                                             |
|                                                               | SDH subunit C (CII-3), cytochrome b560                                 |                                                                                                                                             | ?              | EC651608, EC645437, EC650062, EC648766, EC647940, EC646492, EC651129, EC641865, EC642714, EC641045 |
|                                                               | SDH subunit D (QPs3), cytochrome b small subunit (also anchor protein) |                                                                                                                                             | ?              | EC644822, EC644015                                                                                 |
| AOX                                                           | Alternative oxidase                                                    | terminal electron acceptor                                                                                                                  | ??             | EC651344, EC650155, EC650078, EC649563                                                             |
| PNT                                                           | Pyridine nucleotide transhydrogenase                                   | proton translocator                                                                                                                         | ??             | EC650696, EC641674, EC645828, EC642368                                                             |
| Anaerobic H <sub>2</sub> -metabolism                          | [FeFe] hydrogenase                                                     | electron acceptor/donor                                                                                                                     | +              | EF512299 <sup>†</sup>                                                                              |
|                                                               | PFO                                                                    | anaerobic decarboxylation of pyruvate to acetyl-CoA                                                                                         | +              | EF512300 <sup>†</sup>                                                                              |

|                         |                                                                                                                                                                                       |                                                                                                                                                |                          |                                                                                                                                                                |
|-------------------------|---------------------------------------------------------------------------------------------------------------------------------------------------------------------------------------|------------------------------------------------------------------------------------------------------------------------------------------------|--------------------------|----------------------------------------------------------------------------------------------------------------------------------------------------------------|
| Fe-S cluster assembly   | Frataxin<br>[2Fe-2S] Ferredoxin (Fdx)<br>Glutaredoxin (Grx5)                                                                                                                          | putative iron donor<br>electron transfer protein<br>regulates redox state of cysteine residues                                                 | ?<br>??<br>?             | EC650610, EC642473<br>EC644462, EC644151<br>EC650607, EC646727                                                                                                 |
|                         | Cysteine desulfurase (IscS)<br>putative ABC transporter ATPase (ycf16)<br>mitochondrial metal transporter 1 (Mmt1)<br>Iron sulphur assembly protein Isca2<br>putative ABC transporter | sulphur donor<br>similarity to bacterial SufC<br>involved in iron uptake<br>probably involved in iron binding<br>similarity to bacterial SufBD | +<br>??<br>+<br>??<br>?? | EC650805, EC650524<br>EC644813, EC641049<br>EC650311<br>EC641895<br>EC649314                                                                                   |
| PDH multienzyme complex | Pyruvate dehydrogenase (PDH E1 $\alpha$ )                                                                                                                                             | decarboxylation of pyruvate with the formation of acetyl-CoA, CO <sub>2</sub> and NADH + H <sup>+</sup>                                        | +                        | EF571319                                                                                                                                                       |
|                         | Dihydrolipoyl transacetylase (PDH E2) †<br>Dihydrolipoyl dehydrogenase (PDH E3) §                                                                                                     |                                                                                                                                                | +<br>+                   | EC650042, EC647928<br>EF571320                                                                                                                                 |
| Incomplete TCA cycle    | Malate dehydrogenase (MDH)                                                                                                                                                            | catalyses conversion of malate into oxaloacetate and vice versa                                                                                | ??                       | EC639479, EC647720                                                                                                                                             |
|                         | Fumarate hydratase (FUM)                                                                                                                                                              | catalyses conversion of fumarate to malate and vice versa                                                                                      | +                        | EC650252, EC646717, EC645175, EC643516, EC650299, EC648196, EC644896, EC644366, EC647875, EC646066, EC644739, EC643864, EC644693, EC642693, EC650931, EC644366 |
|                         | Succinyl CoA synthase subunit alpha (probably ATP forming)                                                                                                                            | conversion of succinyl-CoA to succinate coupled with substrate level phosphorylation                                                           | -                        | EC649868, EC649367, EC649326, EC648512, EC650807, EC651453, EC649523, EC650157, EC649259, EC648970, EC648109, EC646528, EC646784, EC647694, EC646851           |
|                         | Succinyl CoA synthase subunit beta (probably ATP forming)                                                                                                                             |                                                                                                                                                | +                        | EC648114, EC643655, EC642446, EC650994, EC649690, EC649221, EC647375, EC645507, EC644723, EC644096                                                             |
| AA metabolism           | Aspartate aminotransferase (DTA)                                                                                                                                                      | amino group transfer                                                                                                                           | ??                       | EC651540, EC648734, EC649876, EC648727, EC648489, EC647643, EC645975, EC651603, EC649364, EC648159, EC646989, EC649574, EC643094                               |

|                                                                              |                                                             |         |                                                                                                                                                                                                                  |
|------------------------------------------------------------------------------|-------------------------------------------------------------|---------|------------------------------------------------------------------------------------------------------------------------------------------------------------------------------------------------------------------|
| Alanine aminotransferase (ATA)                                               | amino group transfer                                        | +       | EC651439, EC650650, EC650476, EC650372, EC650304, EC650569, EC650018, EC650055, EC649448, EC649047, EC648487                                                                                                     |
| Serine hydroxymethyltransferase (SHMT)                                       | Threonine/Serine/Glycine degradation                        | ??      | EC646525, EC651022, EC649971, EC649343, EC649178, EC649124, EC648510, EC647923, EC648857, EC641155, EC644501, EC651327, EC650077, EC646207, EC645417, EC648697, EC647293, EC646685, EC648674, EC646562, EC645915 |
| P-protein (glycine dehydrogenase)                                            | Glycine cleavage system                                     | +       | EC649856, EC645928, EC651548, EC647446, EC644683, EC644550                                                                                                                                                       |
| T-protein (aminomethyltransferase)                                           | Glycine cleavage system                                     | +       | EC646166, EC645811, EC640520, EC641964                                                                                                                                                                           |
| L-protein (dihydrolipoyl dehydrogenase) §<br>H-protein (aminomethyl carrier) | Glycine cleavage system<br>Glycine cleavage system          | +<br>?? | EC642260, EC641617, EC642462<br>EC645562, EC644836, EC644514, EC645149                                                                                                                                           |
| 2-amino-3-ketobutyrate coenzyme A ligase                                     | Thr/Ser/Gly degradation                                     | -       | EC650438, EC650776, EC650547, EC650849, EC650083, EC649957, EC648986, EC649506, EC650270, EC649437, EC648292, EC649144, EC648388                                                                                 |
| Serine dehydrogenase                                                         | catabolises serine to pyruvate                              | +       | EC649883                                                                                                                                                                                                         |
| Threonine dehydrogenase                                                      | Threonine degradation                                       | ??      | EC643109                                                                                                                                                                                                         |
| Branched chain amino acid transaminase                                       | first step in degradation of branched chain amino acids     | +       | EC650634, EC644342, EC643312, EC642998, EC642344                                                                                                                                                                 |
| Isovaleryl-CoA dehydrogenase                                                 | L-Leucine degradation                                       | +       | EC648609                                                                                                                                                                                                         |
| Propionyl-CoA carboxylase (alpha chain)                                      | L-Isoleucine degradation or malate dismutation              | ??      | EC648774, EC649794, EC649499, EC650306, EC644996, EC644843, EC645178, EC648037, EC644017, EC643957, EC648218, EC647409, EC645432                                                                                 |
| 3-hydroxyisobutyrate dehydrogenase                                           | L-Valine degradation                                        | ??      | EC650629                                                                                                                                                                                                         |
| Methylmalonyl-CoA mutase                                                     | L-Valine and L-Isoleucine degradation or malate dismutation | +       | EC644515, EC643690, EC648880, EC648382, EC648470, EC649492, EC646542, EC645960, EC643022                                                                                                                         |

|                            |                                                                 |                                                                                                   |         |                                                                                                                                                      |
|----------------------------|-----------------------------------------------------------------|---------------------------------------------------------------------------------------------------|---------|------------------------------------------------------------------------------------------------------------------------------------------------------|
| Protein import and folding | Hsp70                                                           | part of mitochondrial preprotein import apparatus                                                 | +       | EC646843                                                                                                                                             |
|                            | TOM 70                                                          | promotes substrate binding                                                                        |         | EC648821, EC644043                                                                                                                                   |
|                            | TIM 50                                                          | regulates channel opening                                                                         |         | EC648841                                                                                                                                             |
|                            | TIM 21 <sup>fl</sup>                                            | regulates module docking                                                                          |         | EC649725, EC645410                                                                                                                                   |
|                            | TIM17                                                           | translocation channel                                                                             |         | EC648066                                                                                                                                             |
|                            | TIM 9                                                           | transfer of substrates for TIM22                                                                  |         | EC650533, EC646626                                                                                                                                   |
|                            | Metalloprotease 1 (MP1)<br>Oxidase assembly like protein (OXA1) | probable processing peptidase<br>probably required for assembly of proteins in the inner membrane | ??<br>- | EC651375<br>EC649010                                                                                                                                 |
| Pyruvate metabolism        | Acetate:succinate CoA transferase (ASCT)                        | conversion of acetyl-CoA to acetate                                                               | ??      | EC651134, EC649637, EC649252, EC648431, EC646632, EC646798, EC646644, EC647239, EC643223                                                             |
|                            | Acetyl-CoA synthetase                                           | acetate to acetyl-CoA conversion                                                                  | ??      | EC649035                                                                                                                                             |
|                            | Glyoxalase II                                                   | conversion of 2-oxoaldehyde into 2-hydroxy acids                                                  | -       | EC643472, EC646079                                                                                                                                   |
|                            | Lactoylglutathione lyase (glyoxalase I)                         | conversion of 2-oxoaldehyde into 2-hydroxy acids                                                  | +       | EC650453                                                                                                                                             |
|                            | Pyruvate carboxylase                                            | produces OAA from pyruvate                                                                        | ??      | EC639336, EC645309, EC644717, EC650808, EC648073, EC642631, EC642617, EC650219, EC650500, EC647549                                                   |
| Fatty acid metabolism      | Enoyl-CoA hydratase                                             | $\beta$ -oxidation and/or mitochondrial fatty acid elongation                                     | ??      | EC639510                                                                                                                                             |
|                            | Trans-2-enoyl-CoA reductase (NADPH dependent)                   | mitochondrial fatty acid elongation                                                               | ??      | EC641413                                                                                                                                             |
|                            | Aldehyde dehydrogenase                                          | oxidation of aldehydes                                                                            | SP      | EC649910, EC649542, EC648575, EC645782                                                                                                               |
|                            | Long chain fatty acid CoA ligase                                | $\beta$ -oxidation                                                                                | ??      | EC650632, EC639608, EC642825, EC648878, EC646624, EC645264, EC644773, EC644597, EC643542                                                             |
|                            | Acetyl-CoA carboxylase                                          | transfer of phosphogroups                                                                         | +       | EC650624, EC650340, EC647974, EC646750, EC650236, EC641084, EC651111, EC649722, EC649548, EC649640, EC650577, EC649389, EC650488, EC648695, EC648820 |
|                            | Malonyl-CoA ACP transacetylase (MAT)                            | fatty acid biosynthesis                                                                           | ?       | EC649370                                                                                                                                             |

|                                                    |                                                        |                                                             |                              |                                                                                                              |
|----------------------------------------------------|--------------------------------------------------------|-------------------------------------------------------------|------------------------------|--------------------------------------------------------------------------------------------------------------|
| Proteins associated with mitochondrial translation | (MSD1) Aspartate tRNA ligase                           |                                                             | ??                           | EC642523                                                                                                     |
|                                                    | Leucyl tRNA synthase                                   |                                                             | ??                           | EC644262                                                                                                     |
|                                                    | Elongation factor Tu                                   |                                                             | +                            | EC650363, EC650226, EC647761                                                                                 |
|                                                    | Translation initiation Ef-G                            |                                                             | ??                           | EC648584, EC642691                                                                                           |
|                                                    | Translation initiation factor IF-2                     |                                                             | ?                            | EF571321 †                                                                                                   |
|                                                    | Transcription factor A                                 |                                                             | ??                           | EC650837, EC649244, EC644913                                                                                 |
|                                                    | MRF1 – peptide chain release factor                    | recognizes UAA and UGA stop codons, translation termination | ??                           | EC650000                                                                                                     |
|                                                    | MSS1 – GTPase, proofreading                            | involved in mt tRNA modification                            | ??                           | EC648810                                                                                                     |
|                                                    | MTO1 – protein synthesis, proofreading                 | involved in mt tRNA modification                            | ??                           | EC643540                                                                                                     |
|                                                    | Ribosomal protein S10 (MRP-S10)                        |                                                             | orgDNA?                      | EF512302 †                                                                                                   |
|                                                    | Ribosomal protein S15 (MRP-S15)                        |                                                             | ??                           | EC640558                                                                                                     |
|                                                    | Ribosomal protein L4 (MRP-L4)                          |                                                             | +                            | EC646714, EC649129                                                                                           |
|                                                    | Ribosomal protein L13 (MRP-L13)                        |                                                             | ??                           | EC649559                                                                                                     |
|                                                    | Ribosomal protein L15 (MRP-L15)                        |                                                             | ??                           | EC642912, EC639448                                                                                           |
| Ribosomal protein L22 (MRP-L22)                    |                                                        | +                                                           | EC650947, EC648051, EC650998 |                                                                                                              |
| Ribosomal protein S35 (MRP-S35)                    |                                                        | ??                                                          | EC644470                     |                                                                                                              |
| Ribosomal protein L54/L37 (MRP-L54/L37)            |                                                        | +                                                           | EC644909                     |                                                                                                              |
| Ribosomal protein L24 (MRP-L24)                    |                                                        | ??                                                          | EC645199, EC641408, EC639953 |                                                                                                              |
| Mitochondrial transporters/carriers                | Oxoglutarate/malate carrier (aspartate malate shuttle) |                                                             | ??                           | EC643604, EC648873, EC646830, EC647307, EC642122, EC641487, EC646571, EC639987                               |
|                                                    | Mitochondrial carrier triple repeat protein (Mcart1)   |                                                             | -                            | EC651508, EC650799, EC650535, EC648136, EC648012, EC647525, EC646057, EC645894, EC645779                     |
|                                                    | Aspartate/Glutamate carrier, Aralar (Citrin)           |                                                             | ?                            | EC645628, EC650587, EC651187, EC651431, EC650974, EC650788, EC650530, EC650464                               |
|                                                    | Mitochondrial carrier <sup>  </sup>                    | putative ADP/ATP translocator                               | +                            | EC651395, EC651258, EC651094, EC650984, EC650939, EC650428, EC650643, EC650035, EC649970, EC650120, EC645384 |

|        |                                                                   |                                                                     |    |                                                                                                              |
|--------|-------------------------------------------------------------------|---------------------------------------------------------------------|----|--------------------------------------------------------------------------------------------------------------|
|        | Carnitine/acylcarnitine carrier                                   | catalyses the translocation of long chain fatty acids across the IM | ?  | EC650853, EC650126, EC649180, EC648840, EC648676, EC648345, EC646725, EC646706, EC646314, EC644991           |
|        | Phosphate carrier                                                 | uptake of P <sub>i</sub> and H <sup>+</sup>                         | -  | EC651456, EC651234, EC651166, EC650076, EC649454, EC649415, EC649797, EC649423, EC648276, EC648235, EC650589 |
|        | S-adenosylmethionine carrier protein                              |                                                                     | SP | EC645511                                                                                                     |
|        | Voltage dependent anion channel                                   |                                                                     | ?? | EC644980, EC650620, EC647544                                                                                 |
|        | NA <sup>+</sup> /H <sup>+</sup> antiporter (only prokaryote hits) |                                                                     | ?? | EC644931                                                                                                     |
| Others | Mitochondrial acyl carrier protein                                | cofactor                                                            | ?? | EC646526, EC648882                                                                                           |
|        | Glycerol-3-phosphate dehydrogenase (GUT 2)                        | provides reducing equivalents for the ETC                           | ?? | EC646107, EC649054, EC651227, EC648107, EC645035, EC650185                                                   |
|        | Electron transferring flavoprotein ubiquinone oxidoreductase      | electron transfer protein                                           | +  | EC646109                                                                                                     |
|        | Electron transport flavoprotein, alpha polypeptide (Alpha-ETF)    | electron transfer protein                                           | ?? | EC644907                                                                                                     |
|        | Succinate semialdehyde dehydrogenase                              | GABA catabolism                                                     | ?? | EC647947                                                                                                     |
|        | Prohibitin – mito inner membrane                                  | acts as chaperone to stabilize mito proteins                        | ?? | EC646500, EC648475, EC642422                                                                                 |
|        | Adenylate kinase                                                  | 2ADP = ATP + AMP                                                    | ?? | EC648046, EC642527                                                                                           |
|        | Lipoic acid synthetase                                            | lipoate biosynthesis                                                | ?? | EC641444                                                                                                     |
|        | Lipoyltransferase (lipoate protein B ligase)                      | lipoate biosynthesis                                                | ?? | EC646817, EC642471                                                                                           |
|        | Pyruvate dehydrogenase kinase                                     | inhibitory effect on pyruvate dehydrogenase complex                 | ?? | EC644318                                                                                                     |
|        | Sideroflexin 5                                                    | tricarboxylate carrier, potential iron ion transporter              | ?? | EC645183                                                                                                     |
|        | MSF1-protein                                                      | probable function in intramitochondrial protein sorting             | -  | EC651260, EC644847, EC642982                                                                                 |
|        | AFG1                                                              | mitochondrial ATPase                                                | ?? | EC646878, EC642847, EC642621, EC641021, EC645022                                                             |
|        | Ornithine carbamoyltransferase (OTC)                              | urea cycle                                                          | ?? | EC648481, EC648125                                                                                           |
|        | Carbamoyl phosphate synthase (CPS)                                | urea cycle                                                          | +  | EC651070, EC651063, EC651062, EC651135, EC651472, EC648340, EC648071, EC647274, EC648168                     |
|        | Tafazzin                                                          | acyl-specific transacylase                                          | ?? | EC646053, EC643486                                                                                           |

|                                       |                                           |                                                                      |        |                                        |
|---------------------------------------|-------------------------------------------|----------------------------------------------------------------------|--------|----------------------------------------|
|                                       | Polypeptide deformylase (PDF)             | involved in N-terminal methionine excision of mitochondrial proteins | ??     | EC649264                               |
|                                       | Sirtuin 3                                 | NAD-dependent deacetylase                                            | ??     | EC650269                               |
|                                       | Thioredoxin reductase                     | oxygen salvage                                                       | ??     | EC650904                               |
|                                       | Thioredoxin peroxidase                    | oxygen salvage                                                       | +      | EC651033, EC649953, EC644335           |
|                                       | Thioredoxin                               | oxygen salvage                                                       | +      | EC644328, EC647268                     |
| Proteins from mt genome               | NADH dehydrogenase subunit ND3            |                                                                      | orgDNA | EF494738, EF494739, EF494740 †         |
|                                       | NADH dehydrogenase subunit ND6            |                                                                      | orgDNA | EF494738, EF494739, EF494740 †         |
| Proteins associated with mitochondria | Dynamamin like protein                    | possibly involved in mitochondrial fission                           |        | EC650097, EC646754                     |
|                                       | Ubiquinone biosynthesis protein           |                                                                      |        | EC646586                               |
|                                       | Phosphoenolpyruvate carboxykinase (PEPCK) | conversion between phosphoenolpyruvate and oxaloacetate              |        | EC650958, EC648059, EC646693, EC640731 |

Description of symbols and abbreviations used: +, Presence of a signal peptide as predicted by two or more of all four analyses; -, Absence of a signal peptide despite full length N-terminus including a Met start codon; ?, Only one out of the four programs predicted an N-terminal signal peptide. ??, No full length N-terminus because no 5' Met available; orgDNA, organellar DNA; orgDNA?, possibly organellar DNA; SP, Sequence most probably contains a signal for the secretory pathway.

\*: Target signal determined with TargetP, SignalP, iPSORT, and Mitoprot.

†: Genes for which full length sequences were obtained in this study and sequences generated by PCR in this study.

‡: Could also be E2 subunit of  $\alpha$ -ketoglutarate dehydrogenase complex (succinyl transacetylase).

§: PDH E3 – homologous to L-protein of glycine cleavage system; possibly also  $\alpha$ -ketoglutarate dehydrogenase complex E3 subunit.

¶: Very low Blast score for this protein.

||: Clusters show Blast similarities to Graves disease carrier (solute carrier family 25 member 16) and ADP/ATP translocator (solute carrier family 25 member 43).
